# Supplementary material for: Novel metastable compounds in the Zr–B system: an ab initio evolutionary study
Source: Royal Society of Chemistry journal article supplement (doi:10.1039/c4cp04185b), 2014-11-10
Supplement: c4cp04185b1.pdf [file c4cp04185b1.pdf]

# Novel Metastable Compounds in the Zr-B System: An *ab initio* Evolutionary Study

Jian Li, Changzeng Fan\*

*State Key Laboratory of Metastable Materials Science and Technology,  
Yanshan University, Qinhuangdao 066004, P.R. China*

\* *Corresponding Author E-mail: chzfan@ysu.edu.cn*

## I. Structural Information of ZrB<sub>12</sub>

Table S1 Optimized Crystallographic Data of ZrB<sub>12</sub>

| Space group                            | <i>a</i> (Å) | <i>b</i> (Å) | <i>c</i> (Å) | <i>V</i> (Å <sup>3</sup> ) | <i>Z</i> |
|----------------------------------------|--------------|--------------|--------------|----------------------------|----------|
| <i>Fm</i> $\bar{3}$ <i>m</i> (No. 225) | 7.39         | 7.39         | 7.39         | 403.6                      | 4        |
| atom                                   | position     | <i>x</i>     | <i>y</i>     | <i>z</i>                   |          |
| Zr                                     | 4 <i>a</i>   | 0.0000       | 0.0000       | 0.0000                     |          |
| B                                      | 48 <i>i</i>  | 0.500        | 0.6695       | 0.6695                     |          |

## II. Convergence of Different xc-functionals of DFT

To check the convergence of the "metallicity" property of the studied novel phases Zr<sub>2</sub>B<sub>3</sub> and Zr<sub>3</sub>B<sub>2</sub>. Different xc-functionals of DFT were tested (See figure 1 to figure 4). It was found that, the studied two novel phases are both metallic, independent on the xc-functionals of DFT used.

### 1. non-GGA functional: LDA (See figure S1)

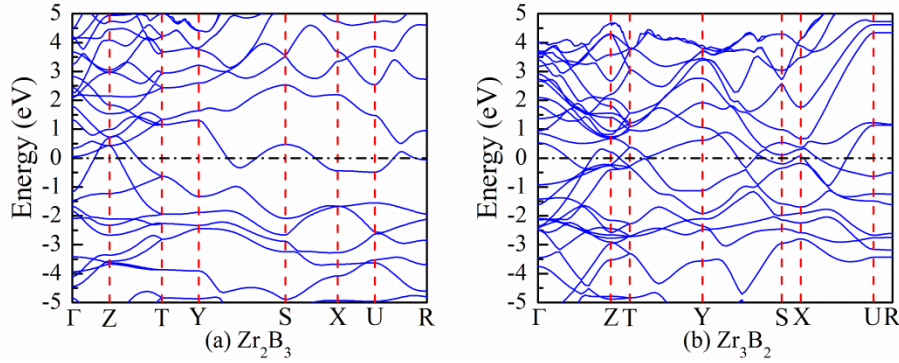

Figure S1: Calculated band structure for  $Zr_2B_3$  and  $Zr_3B_2$  by LDA

### 2. GGA functional: PBEsol (See figure S2)

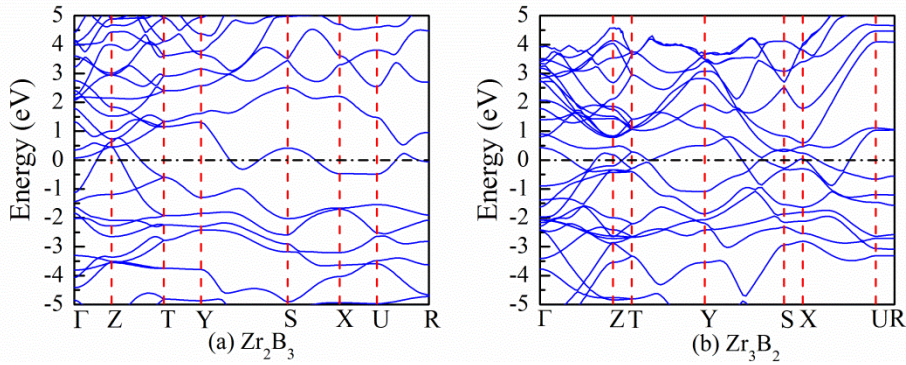

Figure S2: Calculated band structure for  $Zr_2B_3$  and  $Zr_3B_2$  by PBEsol

3. Full-potential linearized augmented plane waves (FLAPW) method as implemented in the WIEN2k code, GGA functional: PBE (See figure S3). (other important parameters are: the muffin-tin radii were selected to be 2.36 and 1.63 (2.47 and 1.68) for the Zr and B atoms in the  $Zr_2B_3$  ( $Zr_3B_2$ ) system; the convergence of the basis set is controlled by a cutoff parameter  $R_{mt} \times K_{max} = 7$ , in which  $K_{max}$  is the magnitude of the largest k vector and the k points are 2000 in the Brillouin zone) .

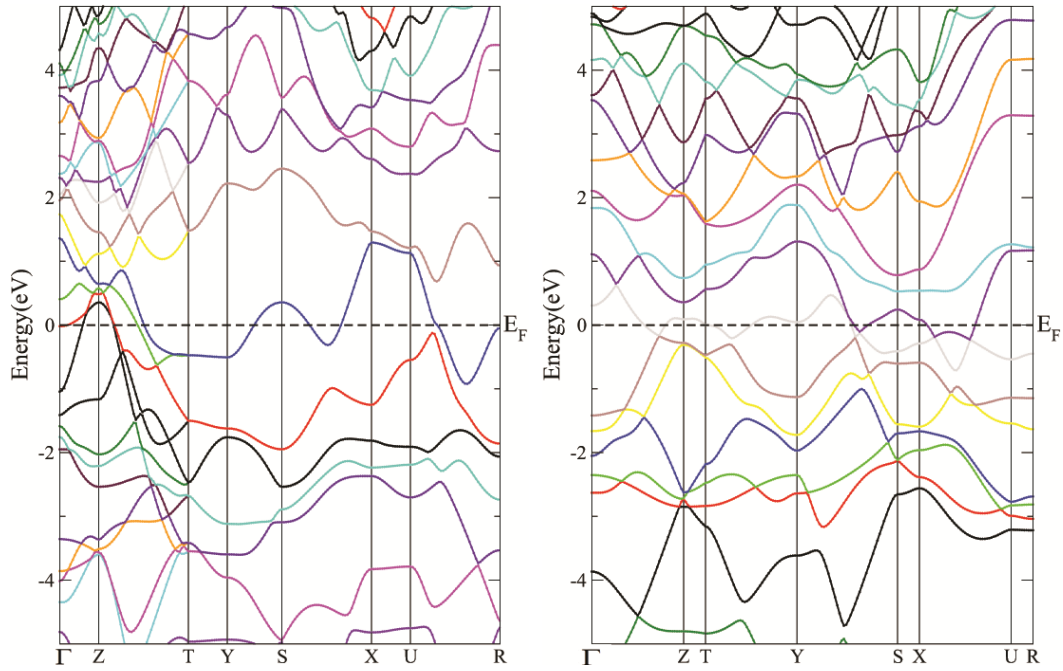

Figure S3: Calculated band structure for  $Zr_2B_3$  and  $Zr_3B_2$  by FLAPW and PBE  
(Left:  $Zr_2B_3$ ; Right:  $Zr_3B_2$ )

4. FLAPW method as implemented in the WIEN2k code, GGA functional:

PBESol (See figure S4). (other parameters are the same as part 3)

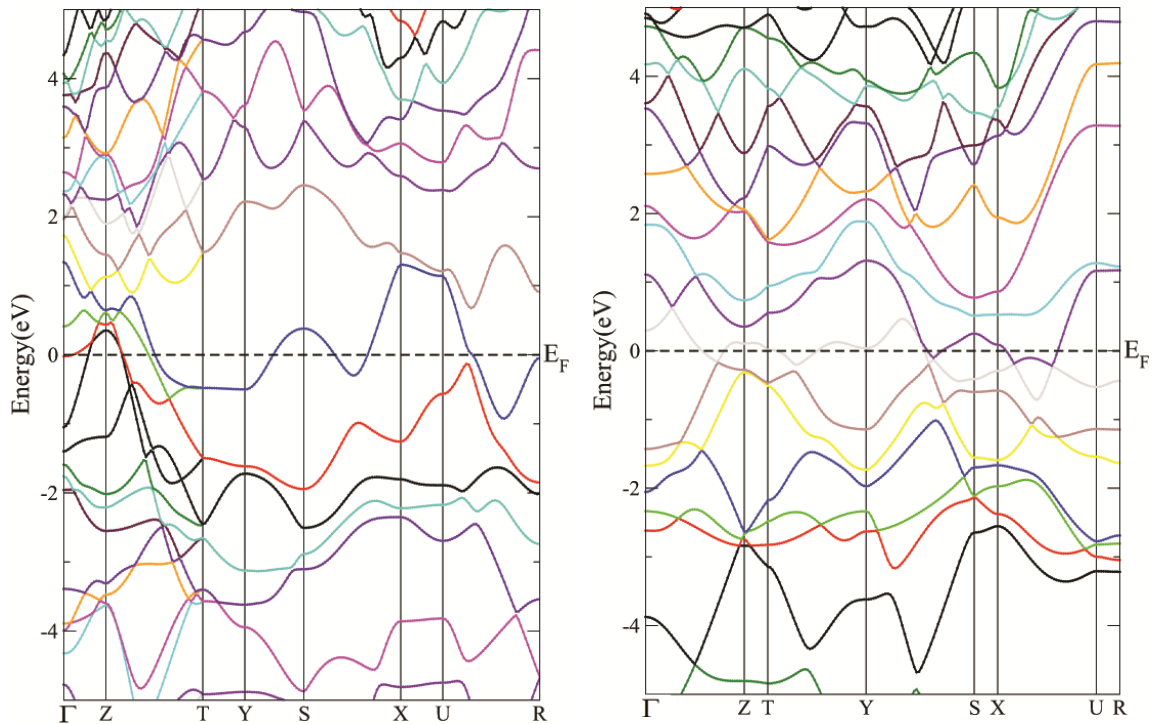

Figure S4: Calculated band structure for  $Zr_2B_3$  and  $Zr_3B_2$  by FLAPW and PBESol  
(Left:  $Zr_2B_3$ ; Right:  $Zr_3B_2$ )
